# Supplementary material for: A competitive immunoassay system for microfluidic paper-based analytical detection of small size molecules
Source: Royal Society of Chemistry journal article supplement (doi:10.1039/c6an01475e), 2016-01-01
Supplement: c6an01475e1.pdf [file c6an01475e1.pdf]

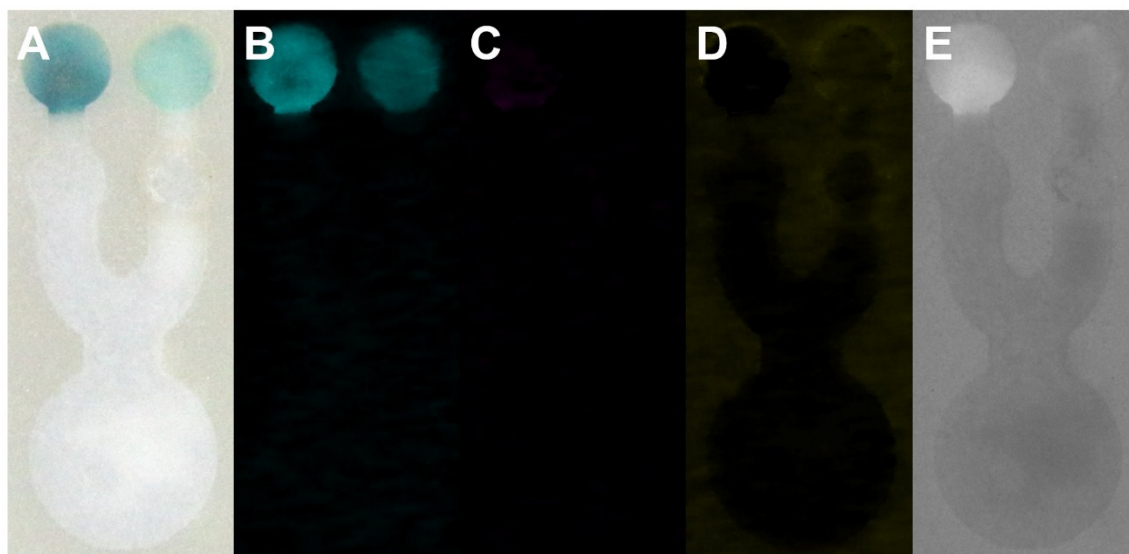

**Fig. S1** (A) An RGB image and its (B) cyan, (C) magenta, (D) yellow, and (E) key split profiles obtained for the FP41  $\mu$ PAD after image-processing with ImageJ.
